# Supplementary material for: Rhanteriol, a New Rhanterium suaveolens Desf. Lignan with Pharmacological Potential as an Inhibitor of Enzymes Involved in Neurodegeneration and Type 2 Diabetes
Source: MDPI journal article supplement (doi:10.3390/plants12020301), 2023-01-09

## Supporting Information

# Rhanteriol, a new *Rhanterium suaveolens* Desf. lignan with pharmacological potential as potent enzyme inhibitor

Soumia Belaabed <sup>1</sup>, Ayoub Khalfaoui <sup>1</sup>, Valentina Parisi <sup>2,3</sup>, Valentina Santoro<sup>2</sup>, Daniela Russo<sup>4</sup>, Maria Ponticelli <sup>4\*</sup>, Magnus Monné <sup>4</sup>, Khellaf Rebbas <sup>5</sup>, Luigi Milella <sup>4\*</sup>, and Giuliana Donadio <sup>2</sup>.

<sup>1</sup> Department of chemistry, Research unit, Development of natural resources, Bioactive molecules, Physicochemical and biological analysis, University Mentouri, Route Ain ElBey 25000 Constantine, Algeria

<sup>2</sup> Dipartimento di Farmacia, Università degli Studi di Salerno, via Giovanni Paolo II 132, 84084 Fisciano (SA), Italy

<sup>3</sup> PhD Program in Drug Discovery and Development, Department of Pharmacy, University of Salerno, Via Giovanni Paolo II 132, 84084, Fisciano, Salerno, Italy.

<sup>4</sup> Dipartimento di Scienze, Università degli Studi della Basilicata, Viale dell'Ateneo Lucano 10, 85100 Potenza, Italy

<sup>5</sup> Natural and Life Sciences Department, Mohamed Boudiaf University, M'sila, Algeria

\* Correspondence: [luigi.milella@unibas.it](mailto:luigi.milella@unibas.it) (L.M.); [maria.ponticelli@unibas.it](mailto:maria.ponticelli@unibas.it) (M.P.) Tel.: +39 0971 205525

## Table of Contents

**Figure S1.**  $^1\text{H}$  NMR spectrum of compound **1** ( $\text{CD}_3\text{OD}$ , 600 MHz)

**Figure S2.**  $^{13}\text{C}$  NMR spectrum of compound **1** ( $\text{CD}_3\text{OD}$ , 150 MHz)

**Figure S3.** COSY spectrum of compound **1** ( $\text{CD}_3\text{OD}$ , 600 MHz)

**Figure S4.** HSQC spectrum of compound **1** ( $\text{CD}_3\text{OD}$ , 600 MHz)

**Figure S5.** HMBC spectrum of compound **1** ( $\text{CD}_3\text{OD}$ , 600 MHz)

**Figure S6.** HRESIMS of compound **1**

**Figure S1.**  $^1\text{H}$  NMR spectrum of compound **1** ( $\text{CD}_3\text{OD}$ , 600 MHz)

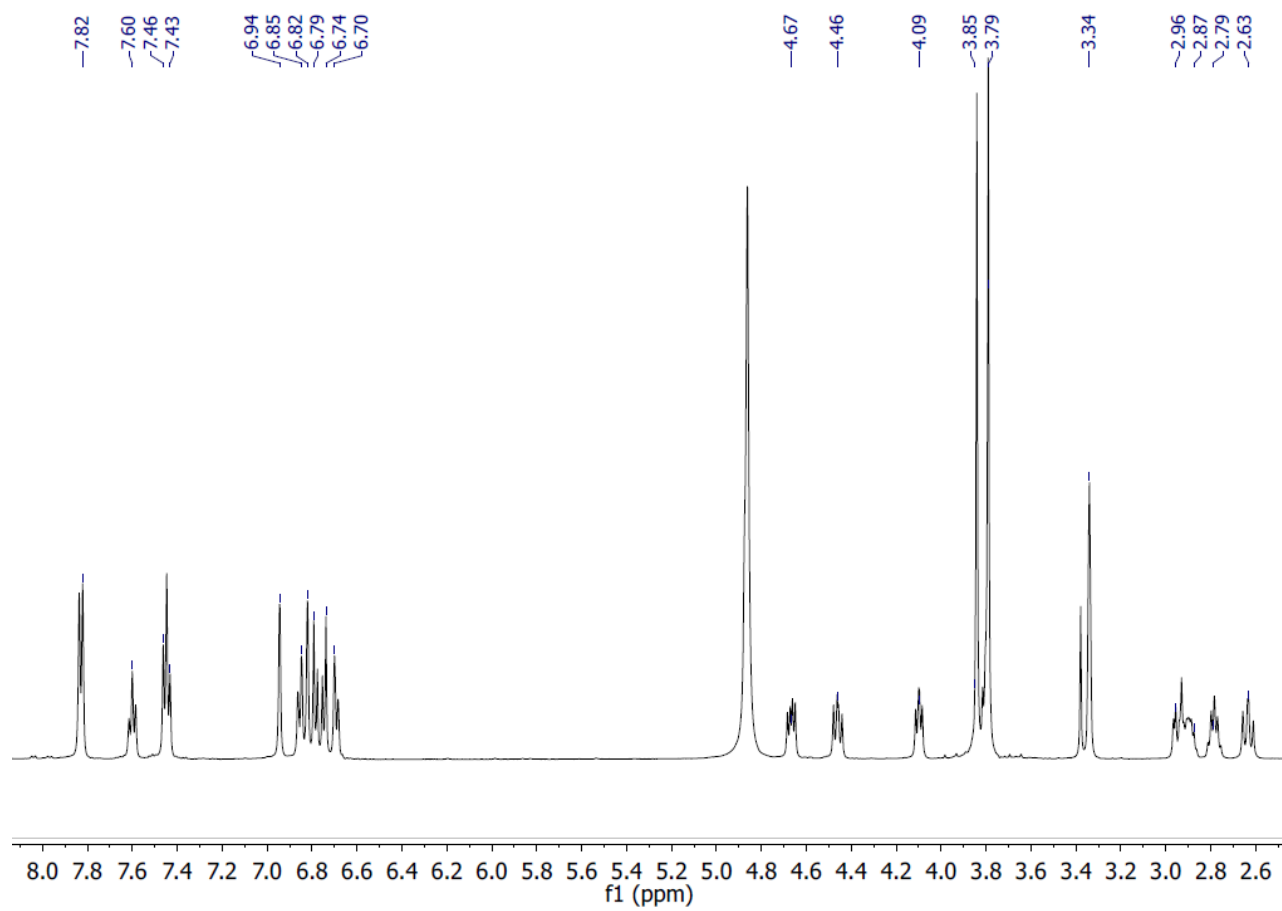

**Figure S2.**  $^{13}\text{C}$  NMR spectrum of compound **1** ( $\text{CD}_3\text{OD}$ , 150 MHz)

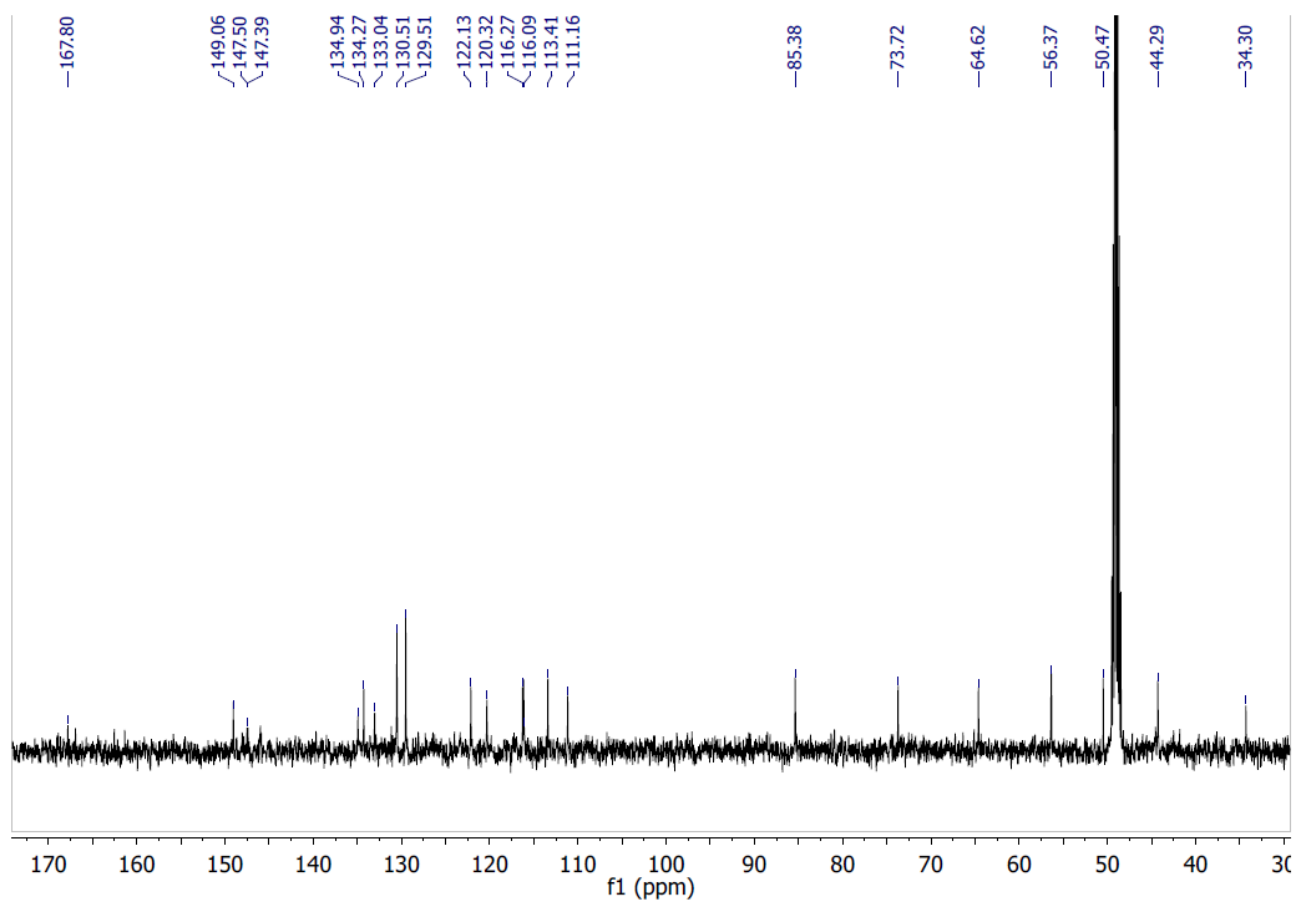

**Figure S3.** COSY spectrum of compound **1** ( $\text{CD}_3\text{OD}$ , 600 MHz)

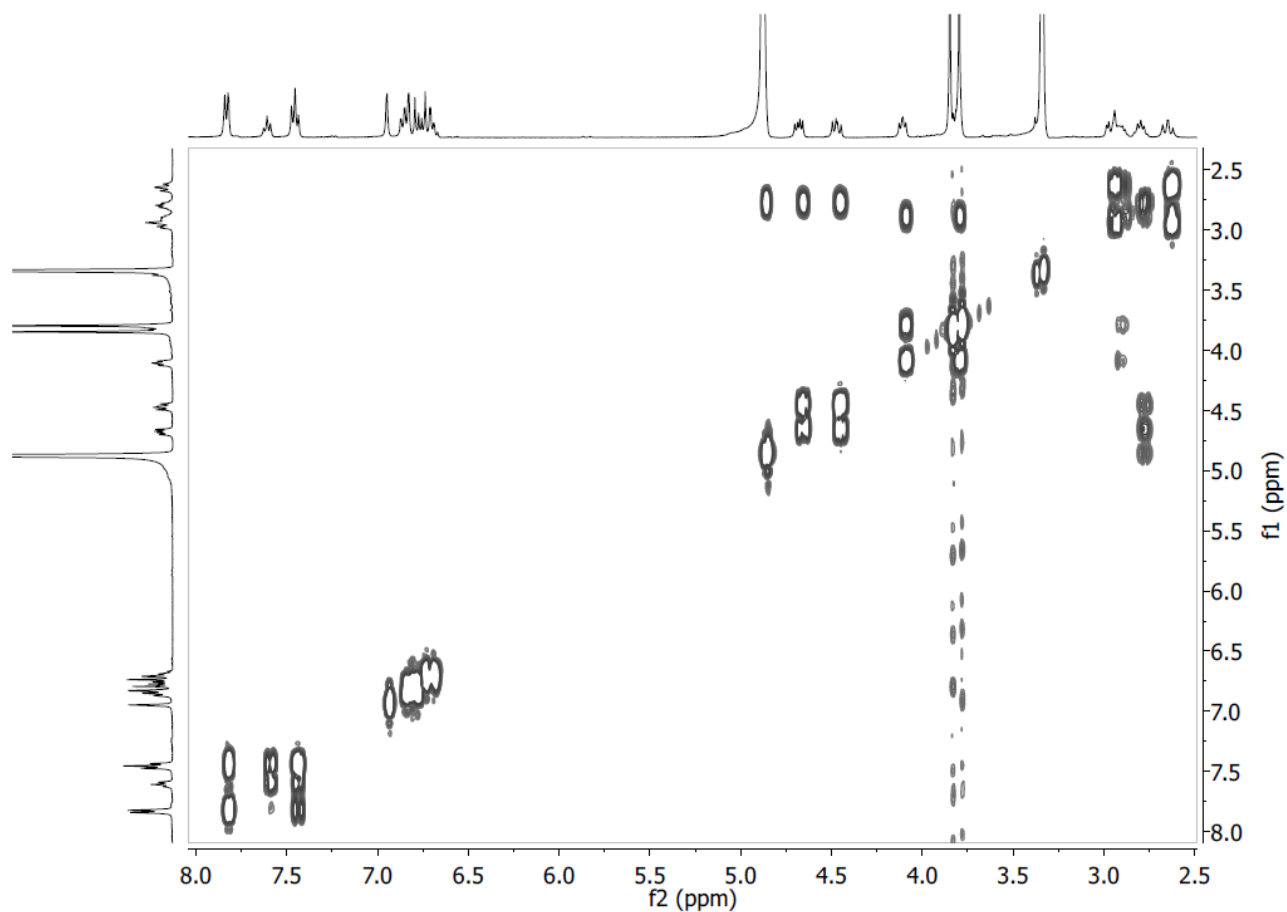

**Figure S4.** HSQC spectrum of compound **1** (CD<sub>3</sub>OD, 600 MHz)

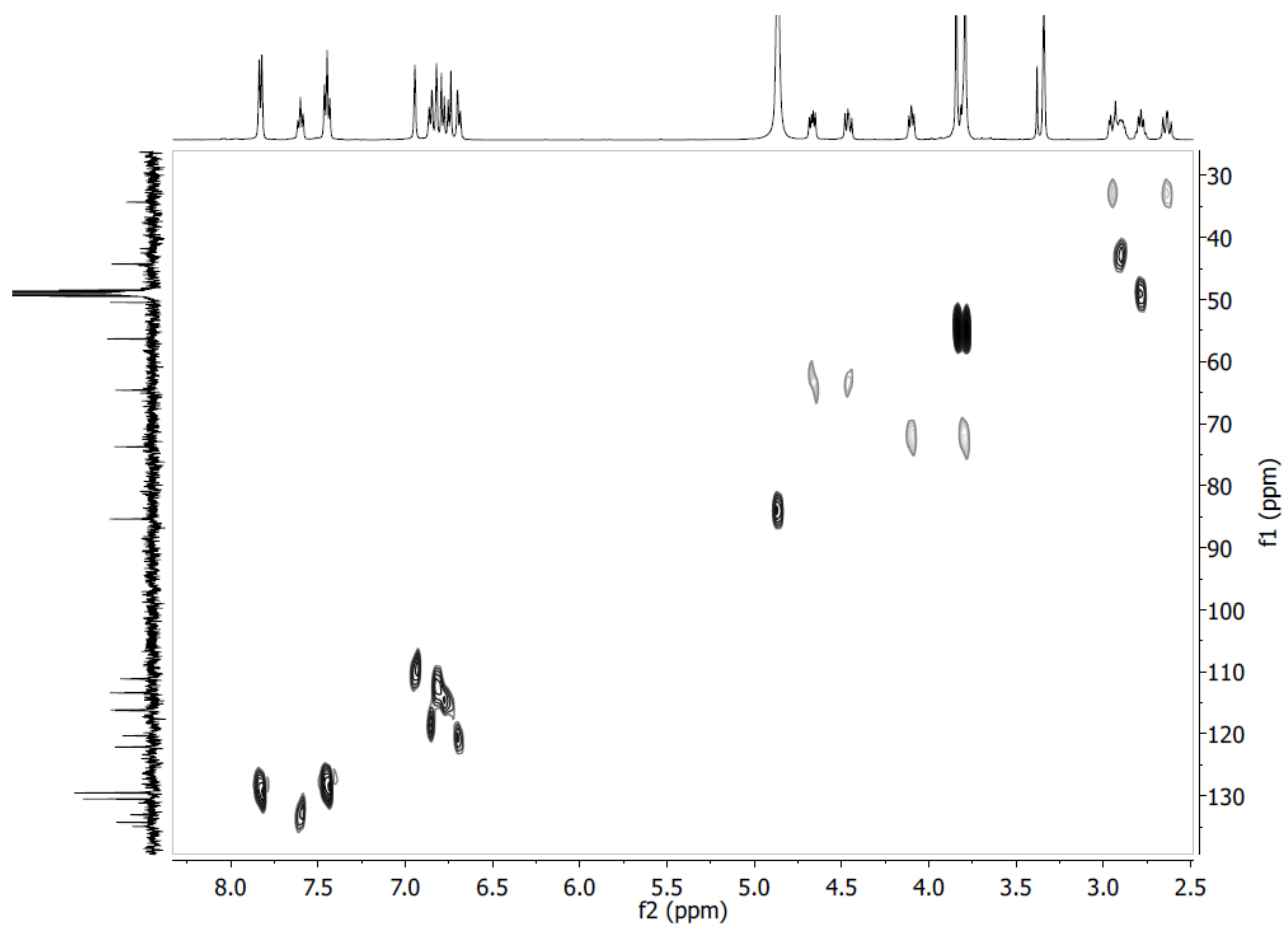

**Figure S5.** HMBC spectrum of compound **1** (CD<sub>3</sub>OD, 600 MHz)

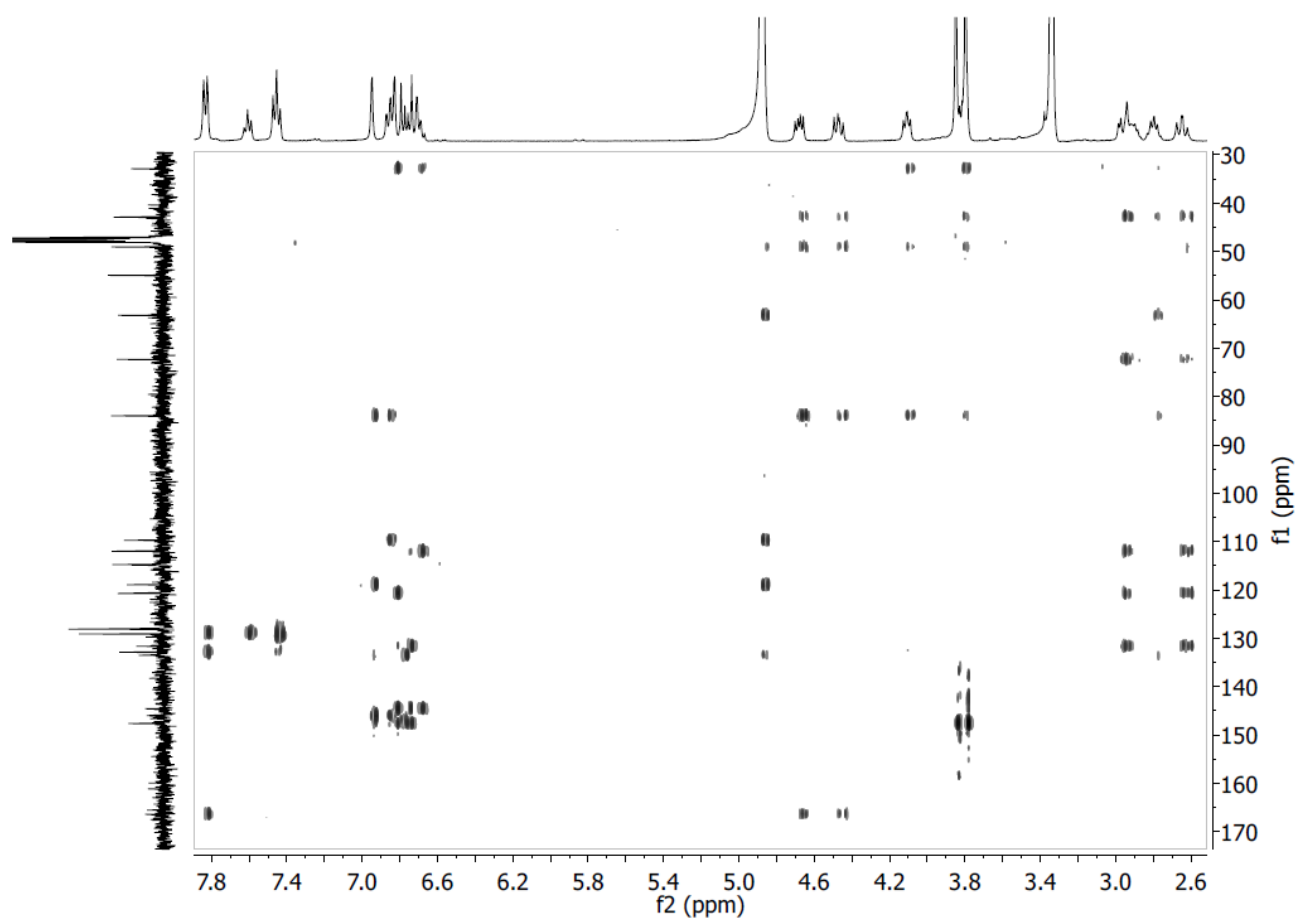

**Figure S6.** HRESIMS of compound **1**

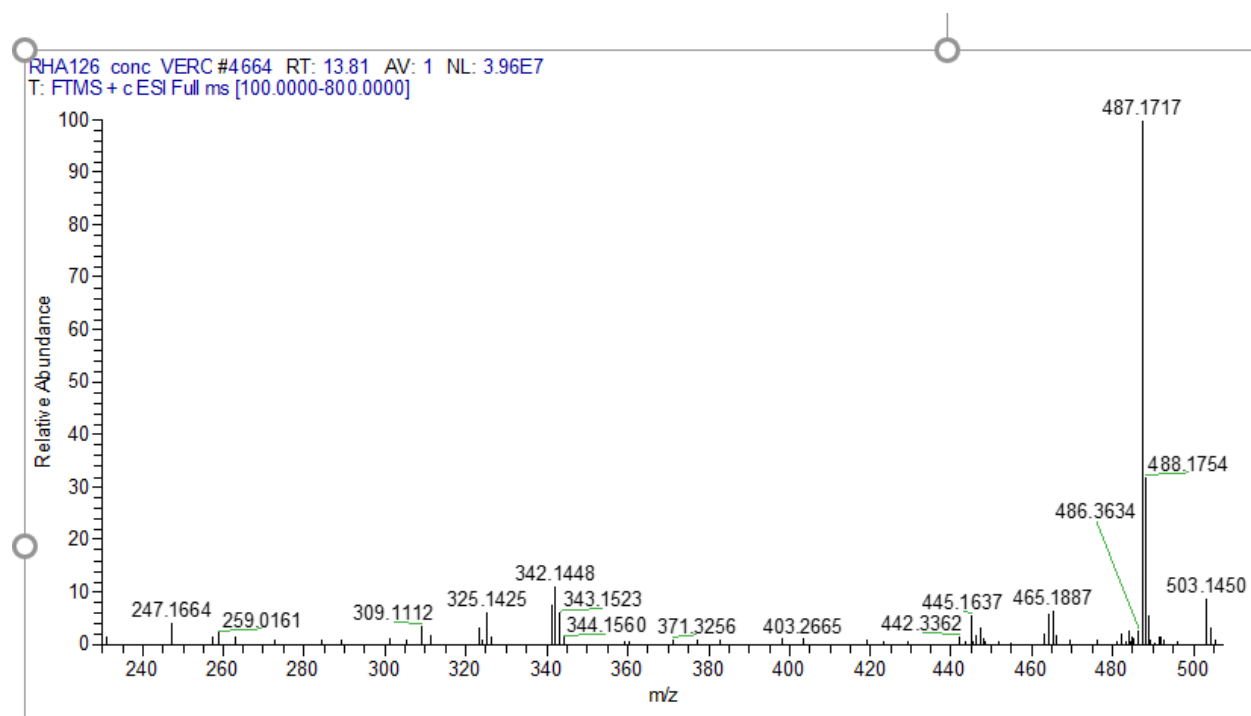

Supplement: s1 [file s1]
